# Supplementary material for: Performance of and Severe Acute Respiratory Syndrome Coronavirus 2 Diagnostics Based on Symptom Onset and Close Contact Exposure: An Analysis From the Test Us at Home Prospective Cohort Study
Source: PubMed Central journal article supplement (PMC11191649; doi:10.1093/ofid/ofae304), 2024-05-31
Supplement: ofae304_supplementary_data.pdf [file ofae304_supplementary_data.pdf]

**Supplemental Figure and Tables: Performance of SARS-CoV-2 Diagnostics Based on Symptom Onset and Close Contact Exposure: An analysis from the Test Us At Home prospective cohort study**

**Contents**

Supplemental Figures: .....2  
    Figure S1: Consort Diagram for Day Past Symptom Onset and Day Past Exposure Analyses.....2  
Supplemental Tables: .....3  
    Table S1: Percent Positivity of Ag-RDT and RT-PCR by Day Past Symptom Onset.....3  
    Table S2: Percent Positivity of Ag-RDT and RT-PCR by Day Past Symptom Onset Among Children and Adults among Symptomatic RT-PCR positive Participants .....4  
    Table S3: Percent Positivity of Ag-RDT and RT-PCR by Day Past Symptom Onset by Variant among Symptomatic RT-PCR Positive Participants .....5  
    Table S4: Percent Positivity of Ag-RDT and RT-PCR by Day Past Symptom Onset by Vaccination Status among Symptomatic RT-PCR Positive Participants .....6  
    Table S5: Percent Positivity of Ag-RDT and RT-PCR by Day Past Symptom Onset Among Males and Females among Symptomatic RT-PCR Positive Participants.....7  
    Table S6: Percent Positivity of Ag-RDT and RT-PCR by Day Past Exposure among Vaccinated and Unvaccinated RT-PCR Positive Participants .....8  
    Table S7: Performance of Ag-RDT and RT-PCR by Day Past Exposure among Symptomatic and Asymptomatic RT-PCR Positive Participants.....9

## Supplemental Figures:

Figure S1: Consort Diagram for Day Past Symptom Onset and Day Past Exposure Analyses

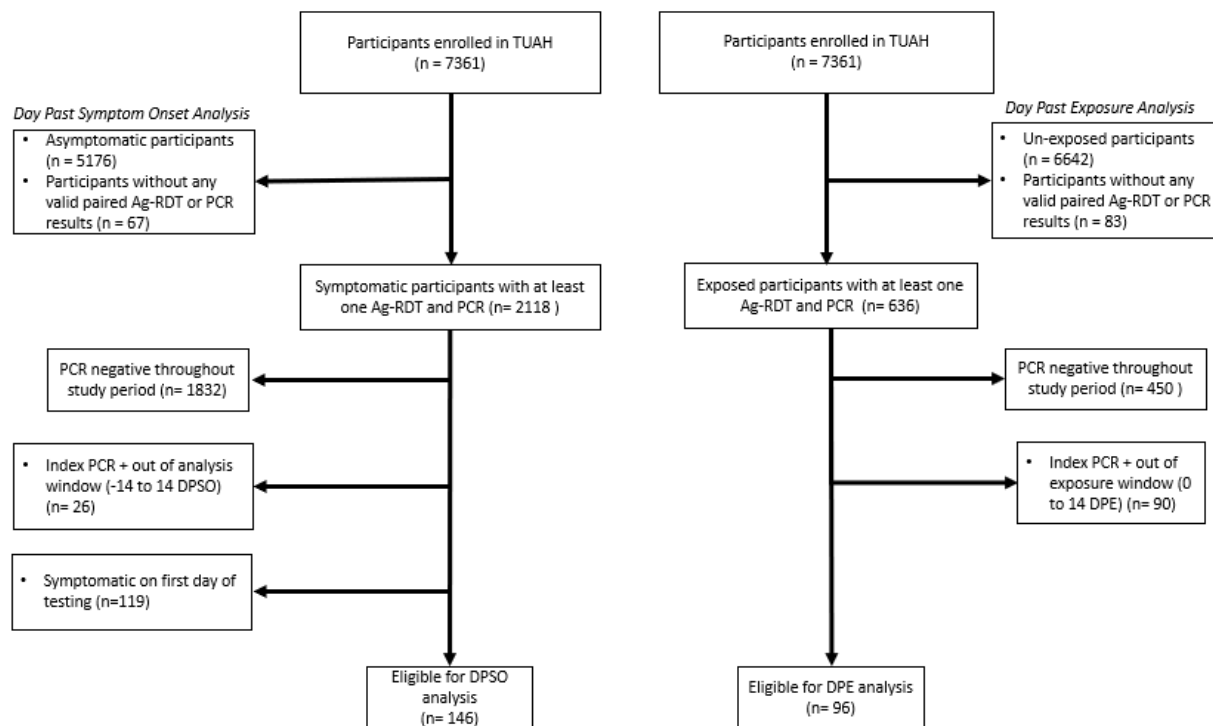

**Legend:** TUAH: Test Us at Home; PCR: Polymerase chain reaction; Ag-RDT: rapid antigen test; DPSO: Day past symptom onset; DPE: Day past exposure

## Supplemental Tables:

Table S1: Percent Positivity of Ag-RDT and RT-PCR by Day Past Symptom Onset

| Day Past Symptom Onset (DPSO) | All Individuals                     |                                     |
|-------------------------------|-------------------------------------|-------------------------------------|
|                               | RT-PCR<br>(95% Confidence Interval) | Ag-RDT<br>(95% Confidence Interval) |
| -4                            | 27.17 (19.14-37.04)                 | 5.26 (2.27-11.73)                   |
| -2                            | 49.62 (41.19-58.07)                 | 25.56 (18.91-33.59)                 |
| 0                             | 82.31 (74.85-87.91)                 | 62.76 (54.66-70.20)                 |
| 2                             | 91.23 (84.60-95.17)                 | 71.09 (62.72-78.24)                 |
| 4                             | 82.65 (73.96-88.88)                 | 64.91 (55.80-73.06)                 |
| 6                             | 79.10 (67.93-87.12)                 | 50.00 (39.99-60.01)                 |
| <b>Cumulative to DPSO 4</b>   | 97.95 (94.13-99.30)                 | 84.93 (78.24-89.83)                 |
| <b>Cumulative to DPSO 6</b>   | 99.31 (96.22-99.96)                 | 86.99 (80.57-91.51)                 |

Table S2: Percent Positivity of Ag-RDT and RT-PCR by Day Past Symptom Onset Among Children and Adults among Symptomatic RT-PCR positive Participants

| Day Past Symptom Onset (DPSO) | Children                         |                                  | Adults                           |                                  |
|-------------------------------|----------------------------------|----------------------------------|----------------------------------|----------------------------------|
|                               | RT-PCR (95% Confidence Interval) | Ag-RDT (95% Confidence Interval) | RT-PCR (95% Confidence Interval) | Ag-RDT (95% Confidence Interval) |
| -4                            | 60.00 (35.75-80.18)              | 6.25 (0.32-28.33)                | 20.78 (13.22-31.12)              | 5.06 (1.99-12.31)                |
| -2                            | 42.86 (24.47-63.45)              | 33.33 (17.97-53.29)              | 50.91 (41.70-60.06)              | 23.85 (16.83-32.66)              |
| 0                             | 91.30 (73.20-97.58)              | 66.67 (47.82-81.36)              | 80.37 (71.85-86.79)              | 61.86 (52.86-70.12)              |
| 2                             | 91.30 (73.20-97.58)              | 70.83 (50.83-85.09)              | 91.21 (83.60-95.48)              | 71.15 (61.82-78.98)              |
| 4                             | 76.47 (52.74-90.44)              | 50.00 (29.93-70.07)              | 83.95 (74.45-90.37)              | 68.09 (58.11-76.64)              |
| 6                             | 69.23 (42.37-87.32)              | 42.86 (21.38-67.41)              | 81.48 (69.16-89.62)              | 51.28 (40.39-62.05)              |
| <b>Cumulative to DPSO 4</b>   | 100.00 (87.54-100.00)            | 85.19 (67.52-94.08)              | 97.47 (92.85-99.14)              | 84.87 (77.35-90.21)              |
| <b>Cumulative to DPSO 6</b>   | 100.00 (87.54-100.00)            | 88.89 (71.94-96.15)              | 99.16 (95.39-99.96)              | 86.55 (79.27-91.55)              |

Table S3: Percent Positivity of Ag-RDT and RT-PCR by Day Past Symptom Onset by Variant among Symptomatic RT-PCR Positive Participants

| Day Past Symptom Onset (DPSO) | Delta Variant                    |                                  | Omicron Variant                  |                                  |
|-------------------------------|----------------------------------|----------------------------------|----------------------------------|----------------------------------|
|                               | RT-PCR (95% Confidence Interval) | Ag-RDT (95% Confidence Interval) | RT-PCR (95% Confidence Interval) | Ag-RDT (95% Confidence Interval) |
| -4                            | 30.43 (15.60-50.87)              | 4.00 (0.21-19.54)                | 27.69 (18.29-39.58)              | 6.06 (2.38-14.57)                |
| -2                            | 71.88 (54.63-84.44)              | 28.13 (15.56-45.37)              | 40.66 (31.14-50.93)              | 25.81 (18.00-35.53)              |
| 0                             | 86.21 (69.44-94.50)              | 69.70 (52.66-82.62)              | 80.22 (70.89-87.11)              | 57.43 (47.69-66.62)              |
| 2                             | 90.91 (72.19-97.47)              | 68.97 (50.77-82.72)              | 91.57 (83.60-95.85)              | 70.00 (59.87-78.49)              |
| 4                             | 71.43 (50.04-86.19)              | 47.83 (29.24-67.04)              | 85.92 (75.98-92.17)              | 70.73 (60.13-79.47)              |
| 6                             | 61.54 (35.52-82.29)              | 25.00 (11.19-46.87)              | 83.67 (70.96-91.49)              | 57.58 (45.56-68.76)              |
| <b>Cumulative to DPSO 4</b>   | 100.00 (89.85-100.00)            | 79.41 (63.29-89.65)              | 98.02 (93.07-99.46)              | 86.14 (78.07-91.56)              |
| <b>Cumulative to DPSO 6</b>   | 100.00 (89.85-100.00)            | 82.35 (66.49-91.65)              | 99.01 (94.60-99.95)              | 88.12 (80.37-93.07)              |

Table S4: Percent Positivity of Ag-RDT and RT-PCR by Day Past Symptom Onset by Vaccination Status among Symptomatic RT-PCR Positive Participants

| Day Past Symptom Onset (DPSO) | Vaccinated Individuals           |                                  | Unvaccinated Individuals         |                                  |
|-------------------------------|----------------------------------|----------------------------------|----------------------------------|----------------------------------|
|                               | RT-PCR (95% Confidence Interval) | Ag-RDT (95% Confidence Interval) | RT-PCR (95% Confidence Interval) | Ag-RDT (95% Confidence Interval) |
| -4                            | 19.05 (11.25-30.41)              | 0.00 (0.00-5.58)                 | 44.83 (28.41-62.45)              | 16.67 (7.34-33.56)               |
| -2                            | 50.00 (39.88-60.12)              | 23.60 (15.98-33.39)              | 48.78 (34.25-63.52)              | 29.55 (18.16-44.22)              |
| 0                             | 81.11 (71.82-87.86)              | 63.27 (53.39-72.14)              | 85.00 (70.93-92.94)              | 61.70 (47.43-74.21)              |
| 2                             | 93.67 (86.03-97.27)              | 75.00 (65.04-82.87)              | 85.71 (70.62-93.74)              | 62.50 (47.03-75.78)              |
| 4                             | 84.51 (74.35-91.12)              | 68.75 (57.93-77.85)              | 77.78 (59.24-89.39)              | 55.88 (39.45-71.12)              |
| 6                             | 80.77 (68.10-89.20)              | 50.00 (38.44-61.56)              | 73.33 (48.05-89.10)              | 50.00 (31.43-68.57)              |
| <b>Cumulative to DPSO 4</b>   | 97.98 (92.93-99.44)              | 86.87 (78.82-92.16)              | 97.87 (88.89-99.89)              | 80.85 (67.46-89.58)              |
| <b>Cumulative to DPSO 6</b>   | 100.00 (96.26-100.00)            | 88.89 (81.19-93.68)              | 97.87 (88.89-99.89)              | 82.98 (69.86-91.11)              |

Table S5: Percent Positivity of Ag-RDT and RT-PCR by Day Past Symptom Onset Among Males and Females among Symptomatic RT-PCR Positive Participants

| Day Past Symptom Onset (DPSO) | Males                            |                                  | Females                          |                                  |
|-------------------------------|----------------------------------|----------------------------------|----------------------------------|----------------------------------|
|                               | RT-PCR (95% Confidence Interval) | Ag-RDT (95% Confidence Interval) | RT-PCR (95% Confidence Interval) | Ag-RDT (95% Confidence Interval) |
| -4                            | 35.48 (21.12-53.05)              | 9.38 (3.24-24.22)                | 22.81 (13.84-35.21)              | 3.39 (0.93-11.54)                |
| -2                            | 48.84 (34.62-63.25)              | 30.23 (18.60-45.11)              | 51.19 (40.69-61.59)              | 23.53 (15.78-33.57)              |
| 0                             | 82.93 (68.74-91.47)              | 63.83 (49.54-76.03)              | 82.14 (72.61-88.87)              | 63.44 (53.30-72.51)              |
| 2                             | 91.89 (78.70-97.20)              | 74.42 (59.76-85.07)              | 90.54 (81.74-95.34)              | 70.37 (59.69-79.21)              |
| 4                             | 87.50 (71.93-95.03)              | 63.89 (47.58-77.52)              | 80.65 (69.15-88.57)              | 64.86 (53.50-74.76)              |
| 6                             | 77.27 (56.56-89.88)              | 51.52 (35.22-67.50)              | 80.49 (65.99-89.77)              | 47.27 (34.69-60.21)              |
| <b>Cumulative to DPSO 4</b>   | 100.00 (92.44-100.00)            | 87.23 (74.83-94.02)              | 96.81 (91.03-98.91)              | 84.04 (75.33-90.08)              |
| <b>Cumulative to DPSO 6</b>   | 100.00 (92.44-100.00)            | 91.49 (80.07-96.64)              | 98.94 (94.22-99.95)              | 85.11 (76.54-90.92)              |

Table S6: Percent Positivity of Ag-RDT and RT-PCR by Day Past Exposure among Vaccinated and Unvaccinated RT-PCR Positive Participants

| Day Past Exposure (DPE)    | Vaccinated Individuals |                        | Unvaccinated Individuals |                        | All Individuals        |                        |
|----------------------------|------------------------|------------------------|--------------------------|------------------------|------------------------|------------------------|
|                            | RT-PCR                 | Ag-RDT                 | RT-PCR                   | Ag-RDT                 | RT-PCR                 | Ag-RDT                 |
| <b>0</b>                   | 15.79<br>(5.52-37.57)  | 5.26<br>(0.27-24.64)   | 62.50<br>(30.57-86.32)   | 12.50<br>(0.64-47.09)  | 29.63<br>(15.85-48.48) | 7.41<br>(2.06-23.37)   |
| <b>2</b>                   | 68.00<br>(48.41-82.79) | 40.74<br>(24.51-59.27) | 78.57<br>(52.41-92.43)   | 40.00<br>(19.82-64.25) | 71.79<br>(56.22-83.46) | 40.48<br>(27.04-55.51) |
| <b>4</b>                   | 87.88<br>(72.67-95.18) | 81.25<br>(64.69-91.11) | 87.50<br>(63.98-96.50)   | 81.25<br>(56.99-93.41) | 87.76<br>(75.76-94.27) | 81.25<br>(68.06-89.81) |
| <b>6</b>                   | 90.91<br>(76.43-96.86) | 85.00<br>(70.93-92.94) | 93.75<br>(71.67-99.68)   | 88.89<br>(67.20-96.90) | 91.84<br>(80.81-96.78) | 86.21<br>(75.07-92.84) |
| <b>8</b>                   | 96.55<br>(82.82-99.82) | 81.82<br>(65.61-91.39) | 78.57<br>(52.41-92.43)   | 57.14<br>(32.59-78.62) | 90.70<br>(78.40-96.32) | 74.47<br>(60.49-84.75) |
| <b>10</b>                  | 96.15<br>(81.11-99.80) | 61.54<br>(42.53-77.57) | 64.29<br>(38.76-83.66)   | 14.29<br>(4.01-39.94)  | 85.00<br>(70.93-92.94) | 45.00<br>(30.71-60.17) |
| <b>Cumulative to DPE 4</b> | 87.50 (73.89-94.54)    | 73.68<br>(57.99-85.03) | 90.91<br>(72.19-97.47)   | 81.48<br>(63.30-91.82) | 89.04<br>(79.84-94.34) | 77.46<br>(66.48-85.63) |
| <b>Cumulative to DPE 6</b> | 97.92 (89.10-99.89)    | 93.75<br>(83.16-97.85) | 95.45<br>(78.20-99.77)   | 95.45 (78.20-99.77)    | 97.59<br>(91.63-99.34) | 93.98<br>(86.66-97.40) |



Table S7: Performance of Ag-RDT and RT-PCR by Day Past Exposure among Symptomatic and Asymptomatic RT-PCR Positive Participants

| Day Past Exposure (DPE) | Symptomatic Individuals          |                                  | Asymptomatic Individuals         |                                  |
|-------------------------|----------------------------------|----------------------------------|----------------------------------|----------------------------------|
|                         | RT-PCR (95% Confidence Interval) | Ag-RDT (95% Confidence Interval) | RT-PCR (95% Confidence Interval) | Ag-RDT (95% Confidence Interval) |
| <b>0</b>                | 60.00 (23.07-88.24)              | 0.00 (0.00-43.45)                | 18.75 (6.59-43.01)               | 6.67 (0.34-29.82)                |
| <b>2</b>                | 94.12 (73.02-99.70)              | 55.56 (33.72-75.44)              | 42.86 (21.38-67.41)              | 13.33 (3.74-37.88)               |
| <b>4</b>                | 93.55 (79.28-98.21)              | 90.32 (75.10-96.65)              | 66.67 (35.42-87.94)              | 37.50 (13.68-69.43)              |
| <b>6</b>                | 92.11 (79.20-97.28)              | 88.10 (75.00-94.81)              | 100.00 (56.55-100.00)            | 100.00 (60.97-100.00)            |
| <b>8</b>                | 92.59 (76.63-97.94)              | 83.33 (66.44-92.66)              | 83.33 (55.20-95.30)              | 61.54 (35.52-82.29)              |
| <b>10</b>               | 90.00 (69.90-97.21)              | 47.37 (27.33-68.29)              | 78.57 (52.41-92.43)              | 50.00 (28.00-72.00)              |
